# Supplementary material for: Osteogenesis enhancement by immobilized DOPA-BMP-2 in combination with ultrasonic stimulation
Source: Royal Society of Chemistry journal article supplement (doi:10.1039/d5ra02354h), 2025-01-01
Supplement: d5ra02354h2.pdf [file d5ra02354h2.pdf]

## Full gel electrophoresis image of Figure S1(b)

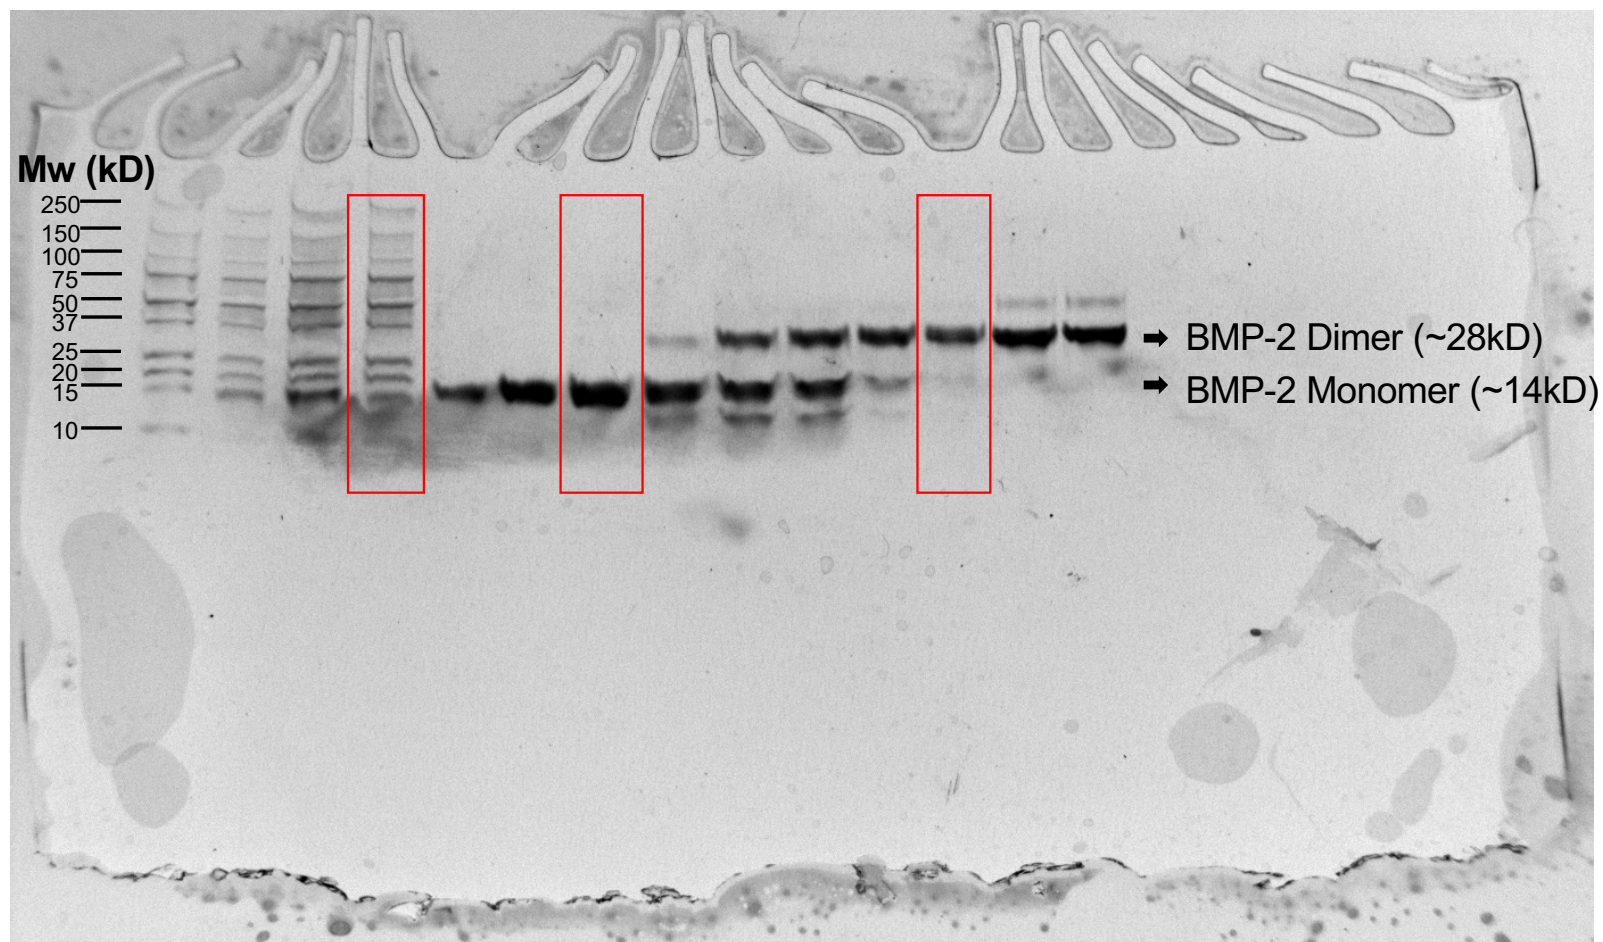

Results in red frames were presented in Figure S1(b) to indicate BMP-2 monomer and dimer, respectively.
